# Supplementary material
Source: publisher site journal article supplement (https://static.cambridge.org/content/id/urn:cambridge.org:id:article:S1041610219002175/resource/name/S1041610219002175supp002.docx)
Supplement: Supplementary file 1 [file S1041610219002175supp002.docx]

**Supplemental Table 2. Dementia syndrome at first visit with dementia among participants who progressed from normal cognition to dementia, skipping MCI**

| Dementia syndrome | **Non-Latinos** | | | | | **Latinos** | | | **Total Participants** |
| --- | --- | --- | --- | --- | --- | --- | --- | --- | --- |
| **White** | **AA** | **AIAN** | **AsA** | **AA+** | **Caribbean** | **Mexican** | **Central/South American** |
| Amnestic multidomain dementia syndrome | 36 (18.1) | 10 (32.3) | 1 (33.3) | 1 (100.0) | 1 (50.0) | 0 (0.0) | 0 (0.0) | 0 (0.0) | 49 |
| Posterior cortical atrophy syndrome | 0 (0.0) | 0 (0.0) | 0 (0.0) | 0 (0.0) | 0 (0.0) | 0 (0.0) | 0 (0.0) | 0 (0.0) | 0 |
| Primary progressive aphasia (PPA) with cognitive impairment Primary progressive aphasia (PPA) with cognitive impairment 3=" | 2 (1.0) | 0 (0.0) | 0 (0.0) | 0 (0.0) | 0 (0.0) | 0 (0.0) | 0 (0.0) | 0 (0.0) | 2 |
| Behavioral variant FTD syndrome (bvFTD) | 2 (1.0) | 0 (0.0) | 0 (0.0) | 0 (0.0) | 0 (0.0) | 0 (0.0) | 0 (0.0) | 0 (0.0) | 2 |
| Lewy body dementia syndrome | 5 (2.5) | 0 (0.0) | 0 (0.0) | 0 (0.0) | 0 (0.0) | 0 (0.0) | 0 (0.0) | 0 (0.0) | 5 |
| Non-amnestic multidomain dementia | 1 (0.5) | 1 (3.2) | 0 (0.0) | 0 (0.0) | 0 (0.0) | 0 (0.0) | 0 (0.0) | 0 (0.0) | 2 |
| Missing dementia syndrome* | 153 (76.9) | 20 (64.5) | 2 (66.7) | 0 (0.0) | 1 (50.0) | 0 (0.0) | 4 (100.0) | 0 (0.0) | 180 |
| Total dementia events for participants who progressed from normal cognition to dementia, skipping MCI | 199 | 31 | 3 | 1 | 2 | 0 | 4 | 0 | 240 |

AA: African American; AIAN: American Indians and Alaska Natives; AsA: Asian Americans; AA+: Individuals simultaneously identifying as African American and another minority race; *Note that most dementia syndromes were assessed beginning with UDSv3 (implemented March 2015), so there is high missingness for these syndromes
